1 Original article

2

3 **MOLECULAR DOCKING ANALYSIS OF SOME PHYTOCHEMICALS ON TWO**  
4 **SARS-COV-2 TARGETS**

5

6

7 Amaka Ubani<sup>1</sup>, Francis Agwom<sup>1</sup>, Nathan Yakubu Shehu<sup>1,2</sup>, Pam Luka<sup>3</sup>, Arinze  
8 Umera<sup>4</sup>, Uzal Umar<sup>4</sup>, Simeon Omale<sup>4</sup>, Nnaemeka Emmanuel Nnadi<sup>5</sup>, John Chinyere  
9 Aguiyi<sup>6</sup>

10

11 1 Department of Pharmaceutical & Medicinal Chemistry, Faculty of  
12 Pharmaceutical Sciences, University of Jos, Nigeria; [agwom2020@gmail.com](mailto:agwom2020@gmail.com)

13 2 [Department of Medicine, Jos University Teaching Hospital, Jos Plateau State,](mailto:nyshehu25@gmail.com)  
14 [Nigeria. nyshehu25@gmail.com](mailto:nyshehu25@gmail.com)

15 3 Biotechnology Centre, National Veterinary Research Institute, Vom. Nigeria,  
16 [pamluka08@gmail.com](mailto:pamluka08@gmail.com)

17 4 [African Centre of Excellence in Phytomedicine Research and development](mailto:jca757@yahoo.com)  
18 [\(ACEPRD\), University of Jos, Nigeria. jca757@yahoo.com](mailto:jca757@yahoo.com)

19 5 Department of Microbiology, Faculty of Natural and Applied Sciences, Plateau  
20 State University, Bokkos, Nigeria [eennadi@gmail.com](mailto:eennadi@gmail.com)

21 6 \* Correspondence: NEN: [eennadi@gmail.com](mailto:eennadi@gmail.com), FA: [jca757@yahoo.com](mailto:jca757@yahoo.com)  
22 Tel.: +2348068124819(F.L.), +2348037016418(FA)

23 Received: date; Accepted: date; Published: date

24 **Abstract:**

25 Severe acute respiratory syndrome coronavirus 2 (SARS-CoV-2) (previously called 2019  
26 novel coronavirus (2019-nCoV) is the causative agent of coronavirus disease 2019  
27 (COVID-19), a disease recently declared a global public health emergency by the World  
28 Health Organization. At the moment there is no available drug(s) and vaccine(s) for the  
29 treatment or prevention of COVID-19. SARS-CoV-2 spike envelope glycoprotein (S) and  
30 main protease (M<sup>pro</sup>) are crucial determinants in the virus infectious process and have been  
31 recognized as key targets for therapeutics designs. In the present *in silico* study, a library of  
32 22 phytochemicals with antiviral activity obtained from PubChem Database was screened  
33 for activity against 6lu7 and 6vsb with the PyRX software. Six lead compounds with  
34 binding energies within the range of -9 to -9.6 Kcal/mol were selected for molecular  
35 docking analyses against 6lu7. SwissADMET and Molinspiration Cheminformatics for  
36 CLogP (mean range of 0.77-8.72) of the lead compounds showed no correlation observed  
37 between lipophilicity and interaction with receptors and all the compounds except for  
38 baicalin exhibited drug-like properties based on Lipinski and Veber filter. The ADMET  
39 profile showed that lead compounds lack hepatotoxicity and mutagenicity effects while

40 they show variable immunotoxicity, carcinogenicity and cytotoxicity. The compounds  
41 Scopodulic acid and Dammarenolic acid showed the best-fit value of activity against  
42 SARS-CoV-2 spike glycoprotein 6vsb and main protease M<sup>pro</sup> 6lu7 targets, respectively.  
43 Our data suggest silibinin a repurposing candidate drug may have multitarget activity  
44 against SARS-CoV-2. So further in vitro and in vivo evaluations are recommended.

45 **Keywords:** *Covid-19, s-glycorotein, M<sup>pro</sup>, Virtual screening*

46

47

## 48 **1. Introduction**

49 Severe acute respiratory syndrome coronavirus 2 (SARS-CoV-2),  
50 family *Coronaviridae*, genus *Betacoronavirus*, is spreading widely in China, causing  
51 coronavirus disease 2019 (COVID-19)(1). Since 2003, three Coronaviruses have  
52 been associated with pneumonia, the first was severe acute respiratory syndrome  
53 coronavirus (SARS-CoV)(2) which affected 8,098 people causing 774 deaths  
54 between 2002 and 2003(3), the second was Middle-East respiratory syndrome  
55 coronavirus (MERS-CoV)(4) which affected 27 countries and infecting a total of  
56 2,494 individuals and claiming 858 lives(4). SARS-CoV-2 is a human pathogen  
57 which has been declared a global pandemic by the World Health Organisation (5).  
58 SARS-CoV and SARS-CoV-2 are closely related and originated in bats, who most  
59 likely serve as a reservoir host for these two viruses (4). To date, no therapeutics  
60 or vaccines are approved against any human-infecting coronaviruses(4).

61

62 The entry into the host cell by the Coronaviruses is usually mediated by spike (S)  
63 glycoprotein (4). This glycoprotein interacts with the angiotensin-converting  
64 enzyme 2 (ACE2) enabling the virus penetration into the host. The main protease  
65 (M<sup>pro</sup> also known as 3CL<sup>pro</sup>) is one of the best-characterized drug targets among  
66 coronaviruses (6). The protease enzyme is essential for processing the polyproteins  
67 that are translated from the viral RNA(7). For this study, these two drug targets  
68 were selected for SARS-CoV-2 using plant-based compounds screened against  
69 them.

70

71 Therefore, potent inhibitors of these two targets will be able to interfere with the  
72 SARS COV-2 replication process and thus serves as potential drugs for the  
73 management of the COVID-19. Hence, this work is aimed at identifying other  
74 potential lead compounds of plant origin that can serve as candidates for testing  
75 against the SARS COV2 virus.

76 .

77 .

## 78 **2. Results**

79 A library of 22 compounds of plant origin known to have antiviral activity was  
80 obtained from Pubchem database. Though the compounds are chemically diverse  
81 they consist of largely flavonoids and terpenes. Some compounds from the citrus  
82 family made were found among the library and demonstrated some good binding  
83 affinities.

84 Most of the compounds have shown similar binding affinities to the selected  
85 protein targets (6lu7 and 6vsb) compared to the training sets of known ligands to  
86 the selected targets. (See table 1)

87

88

89

90

91

92

93

94

95

96

97

98

99 Table 1. Comparison of Binding affinities to some known ligands and the co-  
100 crystalised ligand

| <b>S/N</b> | <b>Group</b>                      | <b>PubChem ID</b> | <b>PyRx Binding Affinity (Kcal/mol) on 6lu7</b> |
|------------|-----------------------------------|-------------------|-------------------------------------------------|
| <b>1.</b>  | Co-crystalised Ligand             | <b>7885280</b>    | <b>4.9</b>                                      |
| <b>2.</b>  | <b>Known Ligands</b>              | <b>11313622</b>   | <b>-7.5</b>                                     |
|            |                                   | <b>121304016</b>  | <b>-5.6</b>                                     |
|            |                                   | <b>235905</b>     | <b>-6.6</b>                                     |
|            |                                   | <b>5284592</b>    | <b>-6.2</b>                                     |
|            |                                   | <b>5475158</b>    | <b>-5.1</b>                                     |
| <b>3</b>   | <b>Phytochemicals (Query Set)</b> | <b>52803443</b>   | <b>-7.1</b>                                     |
|            |                                   | <b>57347487</b>   | <b>-7.2</b>                                     |
|            |                                   | <b>65727</b>      | <b>-7.0</b>                                     |
|            |                                   | <b>1548994</b>    | <b>-6.9</b>                                     |
|            |                                   | <b>11729855</b>   | <b>-6.7</b>                                     |
|            |                                   | <b>479503</b>     | <b>-6.6</b>                                     |
|            |                                   | <b>72303</b>      | <b>-5.6</b>                                     |
|            |                                   | <b>68077</b>      | <b>-5.5</b>                                     |
|            |                                   | <b>72344</b>      | <b>-5.1</b>                                     |

101

102

103

104 However, the top six compounds with most favourable binding affinity were  
105 selected for each of the targets.

106

107

108

109

110

111

112

113

114 The outcome of the binding affinities of the selected compounds on the 6lu7 and  
115 6vbs targets are presented in **Table 2 and Table 3** respectively.

116 **TABLE 2** Binding affinities of the compounds on the 6vsb and their Interaction  
 117 with the binding site

| S/N | Ligands          | Binding Affinity (Kcal/Mol) | Hydrogen Bond Interaction with Residues                    | Hydrophobic Interaction with Residues                                                                                                                                                             | Bond |
|-----|------------------|-----------------------------|------------------------------------------------------------|---------------------------------------------------------------------------------------------------------------------------------------------------------------------------------------------------|------|
| 1.  | Scopadulcic Acid | -9.6                        | GLN B: 913                                                 | TYR C:904, GLY B:1093, VAL B:911, ARG B: 1107, ASN B:907, THR B:912, ASN B:1119, GLN B:1113, GLY B: 910, GLN B:1106, GLU B:1092, PHE A:1121, ARG A:1091                                           |      |
| 2.  | Baicalin         | -9.4                        | ARG B:1039, ARG A:1039, ARG C:1039, ALA B:1020, ASN C:1023 | ALA C:1026, LEU B:1024, GLN C:784, SER C:1030, ASP B:1041, LEU C:1024, THR C:1027, PHE B:1042, PHE C:1042, PHE A:1042, THR B:1027, SER B:1021, GLU C:780.                                         |      |
| 3.  | Sylibinin        | -9.2                        | GLU A:954, ARG B:765                                       | GLU A:1017, ARG A:1014, ALA B:766, LYS B:776, LYS A:947, LEU A:948, PRO A:728, VAL A:951, ILE A:1018, ALA B:766, GLN A:957, GLN B:762, GLN A:1010, ILE A:1013, LEU B:1012, ARG B:1019, GLU B:773. |      |
| 4.  | Solanidine       | -9.1                        |                                                            | TYR A:369, TYR C:489, ARG C:454, PRO C:491, TYR C:421, ASN C:460, LEU C:461                                                                                                                       |      |
| 5.  | Naringenin       | -9.0                        | GLU C:1092, ARG C:1107, ASN C:1108, GLY C:910, ILE C:909   | ASN C:907, THR C:912, GLN C:1113, ARG B:1091, GLU B:1092, GLY C:1093, GLN C:1106, TYR A:904                                                                                                       |      |
| 6.  | Oleanane         | -9                          |                                                            | LEU A:1141, ASP C:1118, LEU C:1141, PRO A:1140, ASP A:1118, THR A:1117, THR B:1116, ASP B:1118, PRO B:1140, GLU B:1144, ASP A:1139, GLU A:1144                                                    |      |

118

119 **TABLE 3** Binding affinities of the compounds on the 6lu7

| S/N | Ligands           | Binding Affinity (Kcal/Mol) |
|-----|-------------------|-----------------------------|
| 1.  | Dammarenolic acid | -7.2                        |
| 2.  | Quercetin         | -7.1                        |

|           |            |      |
|-----------|------------|------|
| <b>3.</b> | Solanidine | -7.0 |
| <b>4.</b> | Silybinin  | -6.8 |
| <b>5.</b> | Loliolide  | -6.7 |
| <b>6.</b> | Shikonin   | -6.6 |

---

120

121 The binding affinities of the top six compounds on the 6vsb target are comparable  
122 to each other that is they all lie within a close range of 9 to 9.6 kcal/mol indicating  
123 that they might likely have equal or comparable potential as lead compounds for  
124 the 6vsb spike glycoprotein.

125

126

127

128

129

130

131

132

133

134

135

136

137

138

139

140

141

142 **Table 4.** Comparison of the calculated cLog P values for the selected compounds

---

| S/N | Compound | SwisADME<br>cLog P | Molinspiration<br>cLog p | Mean calculated<br>P | cLog |
|-----|----------|--------------------|--------------------------|----------------------|------|
|-----|----------|--------------------|--------------------------|----------------------|------|

---

---

|     |                   |      |      |      |
|-----|-------------------|------|------|------|
| 1.  | Scopodulcic acid  | 4.57 | 5.01 | 4.79 |
| 2.  | Baicalin          | 0.22 | 0.55 | 0.77 |
| 3.  | Sylibinin         | 1.59 | 1.47 | 3.06 |
| 4.  | Solanidine        | 5.01 | 5.93 | 5.47 |
| 5.  | Naringenin        | 1.84 | 2.12 | 1.98 |
| 6.  | Oleanane          | 8.57 | 8.86 | 8.72 |
| 7.  | Dammarenolic acid | 6.74 | 8.08 | 7.41 |
| 8.  | Quercetin         | 1.23 | 1.68 | 1.46 |
| 9.  | Loliolide         | 1.53 | 1.84 | 1.69 |
| 10. | Shikonin          | 2.08 | 2.02 | 2.05 |

---

143

144 clog P = octanol/water coefficient

145

146

147 One of the compounds sylibinin (8) is an FDA approved drug, which showed up as  
148 active on both M<sup>Pro</sup> and spike glycoprotein will make a good candidate of  
149 repurposing. Finding Quercetin as a potential inhibitor of the M<sup>p</sup><sup>ro</sup> Protein (6flu7) of  
150 the SARS-COV-2 corresponds with an earlier report(9)

151

152

153 Looking at the cLog P of the compounds, there was no correlation observed  
154 between the lipophilicity and the interaction with the receptors. However, for the  
155 compounds acting on 6lu7 (S/N 3,4,7,8,9 and 10 in Table 4), interaction with the  
156 receptor is correlated with low lipophilicity except for solanidine and Dammarenolic  
157 acid that have high cLogP values. Though both compounds also use their polar  
158 functional groups in interacting with the receptor. Baicalin and Naringenin showed  
159 good hydrogen bond interaction with the 6vsb receptor due to their polarity.

160

161 Filtering the compounds for drug-likeness based on Lipinski's and/or Veber's rule  
162 showed that all the compounds have a drug like properties except baicalin which

163 failed the two filtering scales applied (Table 5). This implies that baicalin is not  
164 worth considering further without any structural modification.

165 **Table 5. Drug likeness**

| S/N | Compound          | Mol. Wt <sup>a</sup> (g/mol) | TPSA <sup>b</sup> | HBA <sup>c</sup> | HBD <sup>d</sup> | RB <sup>e</sup> | cLogP <sup>f</sup> | Lipinski filter | Veber filter |
|-----|-------------------|------------------------------|-------------------|------------------|------------------|-----------------|--------------------|-----------------|--------------|
| 1.  | Scopodulcic acid  | 438.56                       | 80.67             | 5                | 1                | 4               | 4.79               | +               | +            |
| 2.  | Baicalin          | 446.36                       | 187.12            | 11               | 6                | 4               | 0.77               | -               | -            |
| 3.  | Sylibinin         | 482.44                       | 155.14            | 10               | 5                | 4               | 3.06               | +               | -            |
| 4.  | Solanidine        | 397.64                       | 23.47             | 2                | 1                | 0               | 5.47               | +               | -            |
| 5.  | Naringenin        | 272.25                       | 86.99             | 5                | 3                | 1               | 1.98               | +               | +            |
| 6.  | Oleanane          | 412.75                       | 0.00              | 0                | 0                | 0               | 8.72               | +               | +            |
| 7.  | Dammarenolic acid | 458.72                       | 57.53             | 3                | 2                | 1               | 7.41               | +               | +            |
| 8.  | Quercetin         | 302.24                       | 131.36            | 7                | 5                | 1               | 1.46               | +               | +            |
| 9.  | Loliolide         | 196.24                       | 46.53             | 3                | 1                | 0               | 1.69               | +               | +            |
| 10. | Shikonin          | 288.3                        | 94.83             | 5                | 3                | 3               | 2.05               | +               | +            |

166

167 <sup>a</sup>Mol. Wt.: Molecular weight

168 <sup>b</sup>TPSA: Total Polar Surface Area

169 <sup>c</sup>No. HBA: Number of hydrogen bond acceptors

170 <sup>d</sup>No. HBD: Number of hydrogen bond donors

171 <sup>e</sup>No. RB: Number of rotatable bonds

172 <sup>f</sup>Mean clog P: Mean of calculated log P values

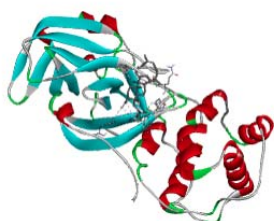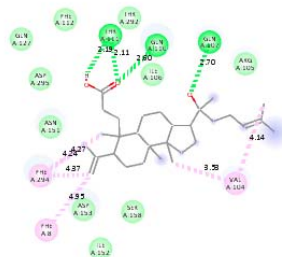

173

174 Figure 1. (a) Dammarenolic acid in the binding pocket of 6lu7 (b) Binding interactions

175 between dammarenolic acid and the 6lu7 protein

176



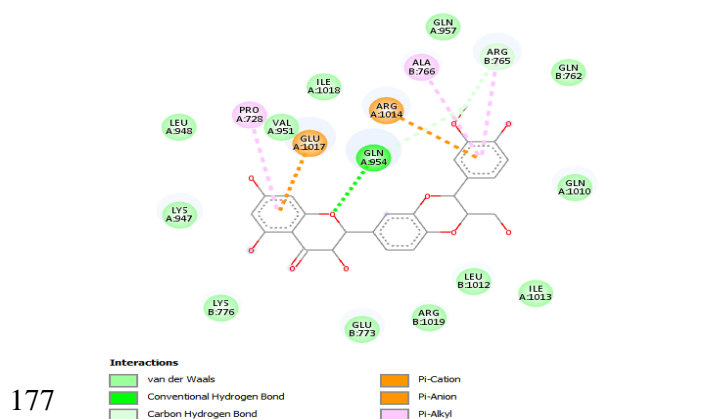

177

178 Figure 2: 2D interaction of 6VSB with Silibinin

179

180

181

182 Table 6. Predicted Toxicity Profile of the compounds using PROTOX II

| S/N | Compound          | Hepatotoxicity | ImmunoToxicity | Carcinogenicity | Mutagenicity | Cytotoxicity | Possible Toxicity Targets |
|-----|-------------------|----------------|----------------|-----------------|--------------|--------------|---------------------------|
| 1.  | Scopodulcic acid  | -              | ++             | -               | -            | -            | AR, AO, PGS               |
| 2.  | Baicalin          | --             | --             | +               | -            | --           | AO, PGS                   |
| 3.  | Sylibinin         | --             | ++             | -               | --           | --           | PGS                       |
| 4.  | Solanidine        | --             | ++             | -               | --           | +            | AR, PGS                   |
| 5.  | Naringenin        | -              | --             | -               | --           | +            | AR, PGS                   |
| 6.  | Oleanane          | --             | --             | ++              | --           | --           |                           |
| 7.  | Dammarenolic acid | -              | -              | --              | --           | --           | AR, AO PGS                |
| 8.  | Quercetin         | -              | +              | --              | -            | --           | AO, AR, PGS               |
| 9.  | Loliolide         | -              | +              | --              | -            | --           | AO, PGS                   |
| 10. | Shikonin          | -              | -              | ++              | -            | +            | PG                        |

183

184 Key: -- inactive, - less inactive, + Active and ++ More active

185 AR = Androgen Receptor, AO = Amine Oxidase A & PGS=Prostaglandin G/H

186 Synthase 1

187

188 The predicted toxicity profile of the selected compounds shows that all the  
189 compounds are likely to be relatively safe. Which makes them good potential  
190 candidates for anti-infectives because the chances of achieving selective toxicity  
191 are high. Baicalin is most likely the safest.

## 192 **Discussion**

193

194 Two compounds among the top six selected for each target, solanidine and  
195 sylibinin were observed to have a good binding affinity on both the 6vsb and the  
196 6flu7. This makes them potential multitarget acting inhibitors on the SARS-COV2.  
197 Solanidine is a Steroidal glycoalkaloids found in potatoes(10), although toxic to  
198 humans and animals, Solanidine has been reported to be effective against herpes  
199 viruses (HSV), herpes genitalis and herpes zoster(11) Its activity against HSV is  
200 attributed to the presence of a sugar moiety(12). In silico method of drug  
201 screening using PROTOX II, showed that Solanidine is cytotoxic and immunotoxic.  
202 Prototox II is a cost and time conservative approach of testing and determining the  
203 toxicity of a compound to be considered a drug of choice(13). It incorporates  
204 molecular similarity, pharmacophores, fragment propensities and machine-learning models  
205 for the prediction of various toxicity endpoints; such as acute toxicity, hepatotoxicity,  
206 cytotoxicity, carcinogenicity, mutagenicity, immunotoxicity, adverse outcomes pathways  
207 (Tox21) and toxicity targets(13)

208 A safe drug must not be toxic to its host target. Based on the Protox II evaluation  
209 of Toxicity, Dammarenolic acid emerges as the compound of choice with the least  
210 toxicity. Dammarenolic acid has been reported as effective antiviral agents  
211 Dammarenolic acid potently inhibited the in vitro replication of other retroviruses,  
212 including simian immunodeficiency virus and Murine leukaemic virus in vector-  
213 based antiviral screening studies and has been proposed as a potential lead  
214 compound in the development of antiretrovirals. (14) The compound is cytotoxic

215 and demonstrates potential against the respiratory syncytial virus(15). We  
216 therefore propose that the evaluation of Dammarenolic acid will hold the key to  
217 COVID19 drug considering its drugability and low toxicity.

218

219 This study proposes a potential re-purposing of silybinin for the management of  
220 COVID19 diseases. Silybinin(Silymarin) possesses potent antiviral activities against  
221 numerous viruses, particularly hepatitis C virus (HCV)(16, 17) It has been reported  
222 to have activities against a wide range of viral groups including flaviviruses  
223 (hepatitis C virus and dengue virus), togaviruses (Chikungunya virus and Mayaro  
224 virus), influenza virus, human immunodeficiency virus, and hepatitis B virus(16).  
225 Silymarin inhibits HCV in both *in vitro* and *in vivo* by inhibiting HCV entry, RNA  
226 synthesis, viral protein expression and infectious virus production; in addition, it also acts  
227 by blocking off the virus cell-to-cell spread(18). As an FDA approved drug for the  
228 management of Hepatitis disease. In silico analysis of this drugs in this study has shown  
229 that it has activity against SAR COV 2 S-glycoprotein and proteas(M<sup>pro</sup>) targets making it a  
230 drug to be considered with multi-target ability in the management of this disease.

231

232

233

#### 234 **4. Materials and Methods**

235 Plant Compounds with antiviral activities were mined from the PubChem database  
236 (<https://pubchem.ncbi.nlm.nih.gov/>). Two proteins including the main protease  
237 (6lu7) and the crystal structure of COVID-19 main protease(19) in complex with an  
238 inhibitor N3 and the Spike glycoprotein, N-ACETYL-D-GLUCOSAMINE  
239 (6vsb[10.1126/science.abb2507](https://doi.org/10.1126/science.abb2507)) were downloaded from the protein database  
240 (PDB). The proteins were prepared using Discovery studio (version)(20) and a rigid  
241 docking scoring function was carried out using PyRx software(21). The results of  
242 the dock poses were visualized using Discovery Studio.

243 The Physicochemical Properties and druggability of selected compounds were  
244 predicted using SwissADME(22) and Molinspiration(23) platforms and their  
245 predicted toxicity profile also compared using the PROTOX platform(24)

246

#### 247 **5. Conclusions**

248 From the 22 phyto-compounds that were virtually screened, Scopodulcic acid and  
249 Dammarenolic acid showed the best binding energies with the Spike glycoprotein  
250 (6vsb) and the M<sup>pro</sup> (6flu7) respectively. This makes them potential lead  
251 compounds for development into candidates against the SARS-COV-2.  
252 Furthermore, the FDA approved drug silybinin (Legalon) with good binding affinity  
253 on the two targets can be evaluated further for possible repurposing against the  
254 SARS-COV-2 virus. We, therefore, propose that these lead compounds be tried for  
255 the COVID19 disease management

256

257

258

259 **Author Contributions:** For research articles with several authors, a short  
260 paragraph specifying their individual contributions must be provided. The following  
261 statements should be used "Conceptualization, N.E. A.U and F.A; methodology,  
262 A.U,F.A ; software, A.U,F.A; validation N.E. A.U , N.S., S.O,J.C..A, A.U,U.U,L.P,and  
263 Z.Z formal analysis, X.X.; investigation, X.X.; resources, X.X.; data curation,  
264 F.A,A.U; writing—original draft preparation, N.E. A.U , N.S., S.O,J.C..A,

265 A.U,U.U,L.P,and; writing—review and editing, N.E. A.U , N.S., S.O,J.C..A,  
266 A.U,U.U,L.P,and; visualization, X.X.; supervision, J.CA,N.E;; funding acquisition,  
267 J.C.A All authors have read and agreed to the published version of the  
268 manuscript.”, please turn to the [CRediT taxonomy](#) for the term explanation.  
269 Authorship must be limited to those who have contributed substantially to the work  
270 reported.

271 **Funding:** This research was funded by World bank-IDA, grant number ACE-  
272 126974” given to J.C.A.

273 **Conflicts of Interest:** Declare conflicts of interest or state “The authors declare  
274 no conflict of interest. The funders had no role in the design of the study; in the  
275 collection, analyses, or interpretation of data; in the writing of the manuscript, or  
276 in the decision to publish the results”.

277

## 278 References

- 279 1. Zhou P, Yang X-L, Wang X-G, Hu B, Zhang L, Zhang W, et al. A pneumonia outbreak associated with  
280 a new coronavirus of probable bat origin. 2020:1-4.
- 281 2. Drosten C, Günther S, Preiser W, Van Der Werf S, Brodt H-R, Becker S, et al. Identification of a novel  
282 coronavirus in patients with severe acute respiratory syndrome. 2003;348(20):1967-76.
- 283 3. Walls AC, Park Y-J, Tortorici MA, Wall A, McGuire AT, Velesler DJC. Structure, function, and  
284 antigenicity of the SARS-CoV-2 spike glycoprotein. 2020.
- 285 4. Zaki AM, Van Boheemen S, Bestebroer TM, Osterhaus AD, Fouchier RAJNEJoM. Isolation of a novel  
286 coronavirus from a man with pneumonia in Saudi Arabia. 2012;367(19):1814-20.
- 287 5. Neher RA, Dyrda R, Druelle V, Hodcroft EB, Albert JSMW. Potential impact of seasonal forcing on  
288 a SARS-CoV-2 pandemic. 2020;150(1112).
- 289 6. Anand K, Ziebuhr J, Wadhvani P, Mesters JR, Hilgenfeld RJS. Coronavirus main proteinase (3CLpro)  
290 structure: basis for design of anti-SARS drugs. 2003;300(5626):1763-7.
- 291 7. Hilgenfeld RJTFj. From SARS to MERS: crystallographic studies on coronaviral proteases enable  
292 antiviral drug design. 2014;281(18):4085-96.
- 293 8. Ferenci P, Scherzer TM, Kerschner H, Rutter K, Beinhardt S, Hofer H, et al. Silibinin is a potent  
294 antiviral agent in patients with chronic hepatitis C not responding to pegylated interferon/ribavirin therapy.  
295 2008;135(5):1561-7.
- 296 9. Chen L, Li J, Luo C, Liu H, Xu W, Chen G, et al. Binding interaction of quercetin-3- $\beta$ -galactoside and  
297 its synthetic derivatives with SARS-CoV 3CLpro: Structure–activity relationship studies reveal salient  
298 pharmacophore features. 2006;14(24):8295-306.
- 299 10. Ginzberg I, Tokuhisa JG, Veilleux REJPR. Potato steroidal glycoalkaloids: biosynthesis and genetic  
300 manipulation. 2009;52(1):1-15.
- 301 11. Friedman M, McDonald GM, Filadelfi-Keszi MJCRiPS. Potato glycoalkaloids: chemistry, analysis,  
302 safety, and plant physiology. 1997;16(1):55-132.
- 303 12. Thorne H, Clarke G, Skuce RJAr. The inactivation of herpes simplex virus by some Solanaceae  
304 glycoalkaloids. 1985;5(6):335-43.
- 305 13. Banerjee P, Eckert AO, Schrey AK, Preissner RJNar. ProTox-II: a webserver for the prediction of  
306 toxicity of chemicals. 2018;46(W1):W257-W63.

- 307 14. Esimone CO, Eck G, Nworu CS, Hoffmann D, Überla K, Proksch PJP. Dammarenolic acid, a  
308 secodammarane triterpenoid from *Aglaia* sp. shows potent anti-retroviral activity in vitro. 2010;17(7):540-7.
- 309 15. Esimone C, Eck G, Duong T, Überla K, Proksch P, Grunwald TJDP-AIJoPS. Potential anti-respiratory  
310 syncytial virus lead compounds from *Aglaia* species. 2008;63(10):768-73.
- 311 16. Liu C-H, Jassey A, Hsu H-Y, Lin L-TJM. Antiviral Activities of Silymarin and Derivatives.  
312 2019;24(8):1552.
- 313 17. Polyak SJ, Ferenci P, Pawlotsky JM. Hepatoprotective and antiviral functions of silymarin  
314 components in hepatitis C virus infection. 2013;57(3):1262-71.
- 315 18. Wagoner J, Negash A, Kane OJ, Martinez LE, Nahmias Y, Bourne N, et al. Multiple effects of  
316 silymarin on the hepatitis C virus lifecycle. 2010;51(6):1912-21.
- 317 19. 10.2210/pdb6LU7/pdb.
- 318 20. Biovia DSJSD. Discovery Studio Modeling Environment Release 2017, Dassault Systemes. 2016.
- 319 21. Dallakyan S, Olson AJ. Small-molecule library screening by docking with PyRx. *Chemical biology*:  
320 Springer; 2015. p. 243-50.
- 321 22. Daina A, Michielin O, Zoete VJSr. SwissADME: a free web tool to evaluate pharmacokinetics, drug-  
322 likeness and medicinal chemistry friendliness of small molecules. 2017;7:42717.
- 323 23. Jarrahpour A, Motamedifar M, Zarei M, Youssoufi M, Mimouni M, Chohan Z, et al. Petra, osiris, and  
324 molinspiration together as a guide in drug design: predictions and correlation structure/antibacterial activity  
325 relationships of new N-Sulfonyl monocyclic  $\beta$ -lactams. 2010;185(2):491-7.
- 326 24. Drwal MN, Banerjee P, Dunkel M, Wettig MR, Preissner RJNar. ProTox: a web server for the in silico  
327 prediction of rodent oral toxicity. 2014;42(W1):W53-W8.
- 328
- 329
